# Supplementary material
Source: PubMed Central journal article supplement (PMC8169950)
Supplement: mmc1.pdf [file mmc1.pdf]

**Supplemental information**

**Therapeutic antibodies, targeting the SARS-CoV-2**

**spike N-terminal domain, protect**

**lethally infected K18-hACE2 mice**

**Tal Noy-Porat, Adva Mechaly, Yinon Levy, Efi Makdasi, Ron Alcalay, David Gur, Moshe Aftalion, Reut Falach, Shani Leviatan Ben-Arye, Shirley Lazar, Ayelet Zauberman, Eyal Epstein, Theodor Chitlaru, Shay Weiss, Hagit Achdout, Jonathan D. Edgeworth, Raghavendra Kikkeri, Hai Yu, Xi Chen, Shmuel Yitzhaki, Shmuel C. Shapira, Vered Padler-Karavani, Ohad Mazor, and Ronit Rosenfeld**

**Table S1. *In vitro* neutralization of SARS-CoV-2 by NTD-specific mAbs**

| <b>mAb</b> | <b>IC<sub>50</sub> (µg/ml)</b> |
|------------|--------------------------------|
| BLN1       | 0.008                          |
| BLN2       | 0.25                           |
| BLN3       | 0.10                           |
| BLN4       | 9                              |
| BLN5       | 0.26                           |
| BLN6       | 5.4                            |
| BLN7       | 0.07                           |
| BLN8       | 54.9                           |
| BLN9       | 0.39                           |
| BLN10      | 0.13                           |
| BLN12      | 0.008                          |
| BLN14      | 0.03                           |

SARS-CoV-2 *in vitro* neutralization potency of the selected anti-NTD mAbs, was evaluated by plaque reduction neutralization test (PRNT). Half-maximum inhibitory concentration (IC<sub>50</sub>) values are presented. Relates to Figure 1.



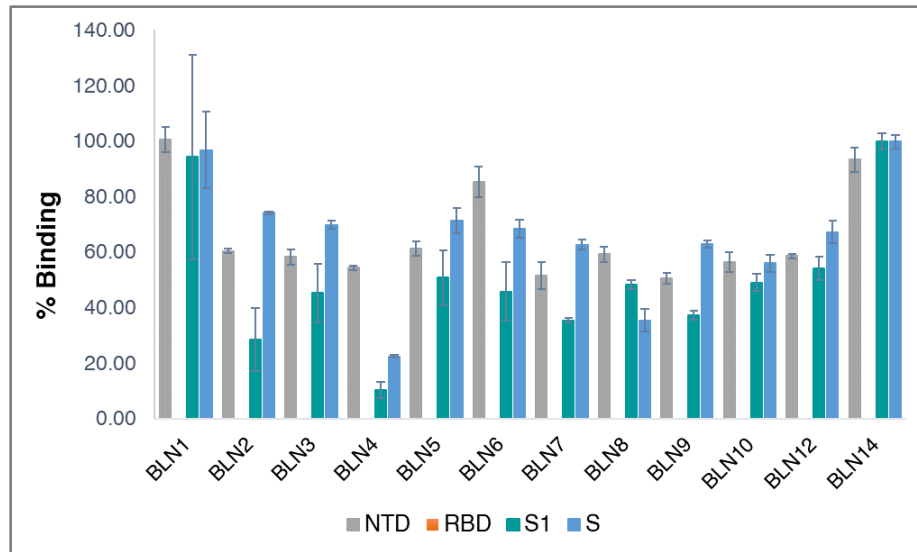

**Figure S3: Normalized binding specificity of anti-NTD mAbs.** Relates to Figure 1A. The specificity of each mAb was tested by ELISA using the indicated proteins as capturing antigens, at 1  $\mu\text{g/ml}$  each. The obtained O.D. values, were normalized to each antigen Bmax value. Data represent average of triplicates  $\pm$  SEM. RBD values were below detection limit.

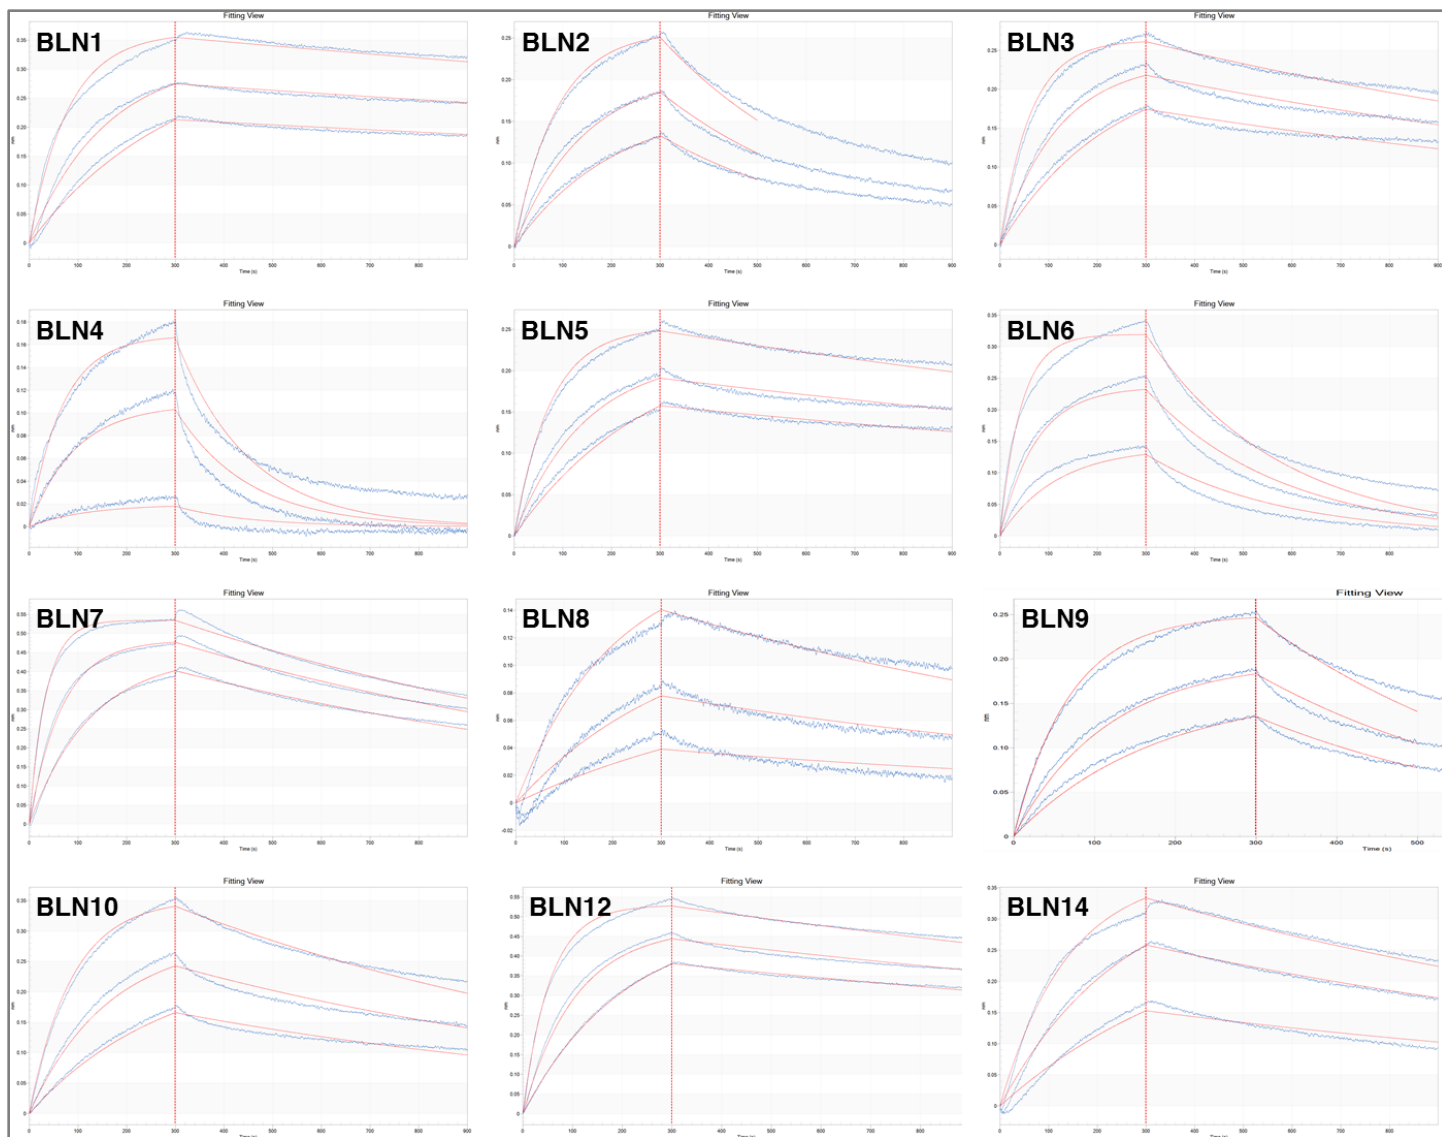

**Figure S4. NTD-specific mAbs affinity determination by BLI.** Relates to Table 2.

Biolayer interferometry analysis used for the determination of the 12 selected anti-NTD mAbs. Streptavidin-coated biosensors were loaded with each biotinylated mAb and reacted for 300 s with the indicated concentrations of the recombinant NTD (association phase) and then transferred to buffer-containing wells for another 600 s (dissociation phase). Sensograms (after subtraction of parallel measurements from unloaded biosensors) were fitted with 1:1 binding model (red curves) using the Octet data analysis software 8.1.

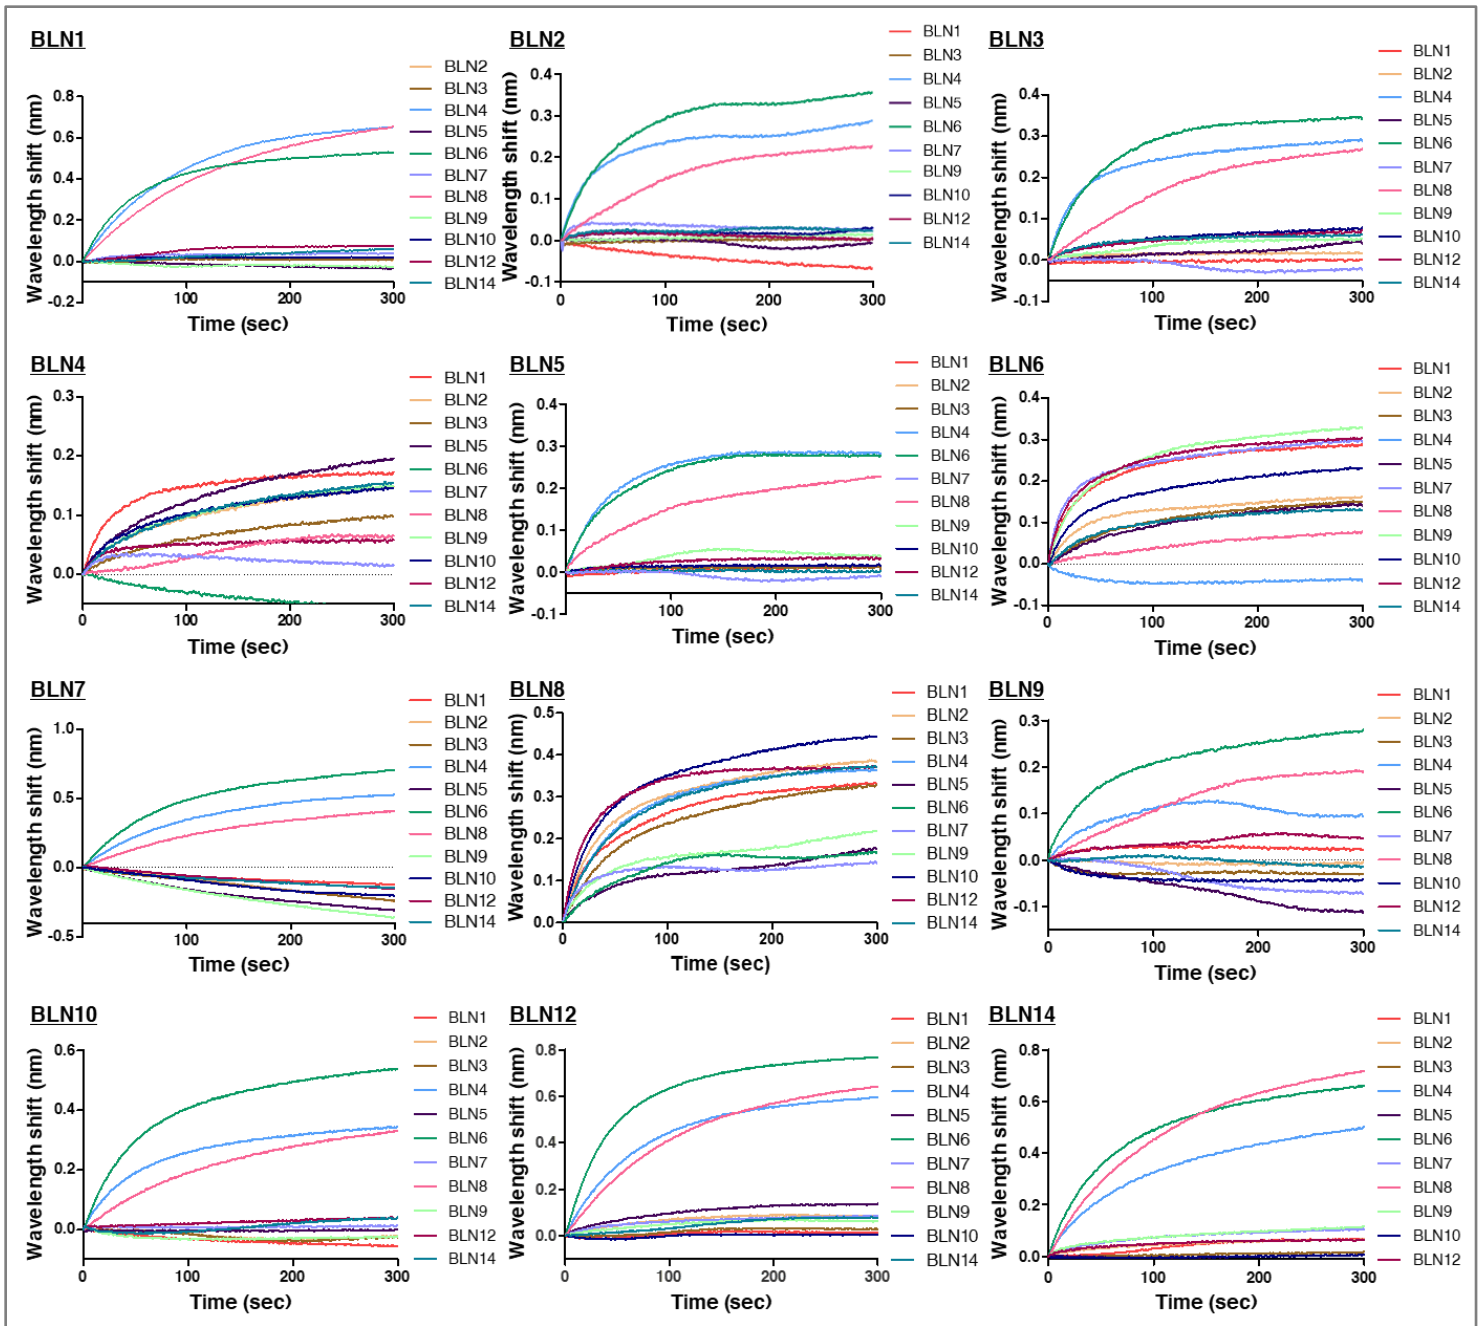

**Figure S5. Epitope binning of the selected anti-NTD mAbs, by Biolayer interferometry (BLI).** Relates to Figure 2. Each purified antibody (indicated on the left upper side of each sensogram) was biotinylated, immobilized on a streptavidin biosensor and saturated with S1. The complex (mAb-S1; Time 0) was then incubated for 300 s with each one of the other antibodies (colored differently according to the mAb, as indicated within the panels). Competition of each mAb with itself, served as a negative control, subtracted from the data before generation of the depicted sensograms.



**A**

| Blanked Data [OD 405]              |           |          |          |         |          |          |          |          |          |          |          |                             |
|------------------------------------|-----------|----------|----------|---------|----------|----------|----------|----------|----------|----------|----------|-----------------------------|
|                                    | 1         | 2        | 3        | 4       | 5        | 6        | 7        | 8        | 9        | 10       | 11       | 12                          |
| A                                  | -0.003    | 0        | 0        | 0.003   | 0.004    | 0.002    | 0.004    | 0.004    | 0.003    | 0.001    | -0.003   | -0.004                      |
| B                                  | 0.001     | 0.005    | 0.004    | 0.008   | 0.005    | 0.003    | 0        | 0        | 0.005    | 0.003    | -0.003   | -0.004                      |
| C                                  | 0.004     | 0.007    | 0.012    | 0.02    | 0.011    | 0.004    | 0.006    | 0.005    | 0.011    | 0.008    | 0.007    | 0.001                       |
| D                                  | 0.004     | 0.017    | 0.016    | 0.022   | 0.015    | 0.016    | 0.014    | 0.017    | 0.015    | 0.014    | 0.011    | 0.003                       |
| E                                  | 0.01      | 0.018    | 0.016    | 0.016   | 0.019    | 0.021    | 0.015    | 0.014    | 0.01     | 0.01     | 0.009    | 0.014                       |
| F                                  | 0.59      | 0.55     | 0.51     | 0.44    | 0.34     | 0.23     | 0.13     | 0.07     | 0.03     | 0.02     | 0.01     | 0.003                       |
| G                                  | 0.59      | 0.56     | 0.50     | 0.44    | 0.33     | 0.21     | 0.11     | 0.05     | 0.02     | 0.01     | 0.01     | 0.001                       |
| H                                  | 0.58      | 0.55     | 0.49     | 0.42    | 0.33     | 0.22     | 0.11     | 0.04     | 0.02     | 0.01     | 0.00     | -0.004                      |
|                                    |           |          |          |         |          |          |          |          |          |          |          | BLN14 treated mice sera     |
| Plate description                  |           |          |          |         |          |          |          |          |          |          |          |                             |
|                                    | 1         | 2        | 3        | 4       | 5        | 6        | 7        | 8        | 9        | 10       | 11       | 12                          |
| A                                  | M1 1:10   | M1 1:20  | M1 1:40  | M1 1:80 | M6 1:10  | M6 1:20  | M6 1:40  | M6 1:80  | M11 1:10 | M11 1:20 | M11 1:40 | M11 1:80                    |
| B                                  | M2 1:10   | M2 1:20  | M2 1:40  | M2 1:80 | M7 1:10  | M7 1:20  | M7 1:40  | M7 1:80  | M12 1:10 | M12 1:20 | M12 1:40 | M12 1:80                    |
| C                                  | M3 1:10   | M3 1:20  | M3 1:40  | M3 1:80 | M8 1:10  | M8 1:20  | M8 1:40  | M8 1:80  | M13 1:10 | M13 1:20 | M13 1:40 | M13 1:80                    |
| D                                  | M4 1:10   | M4 1:20  | M4 1:40  | M4 1:80 | M9 1:10  | M9 1:20  | M9 1:40  | M9 1:80  | M14 1:10 | M14 1:20 | M14 1:40 | M14 1:80                    |
| E                                  | M5 1:10   | M5 1:20  | M5 1:40  | M5 1:80 | M10 1:10 | M10 1:20 | M10 1:40 | M10 1:80 | M15 1:10 | M15 1:20 | M15 1:40 | M15 1:80                    |
| F                                  | 10,000.00 | 3,333.33 | 1,111.11 | 370.37  | 123.46   | 41.15    | 13.72    | 4.57     | 1.52     | 0.51     | 0.17     | Blk                         |
| G                                  | 10,000.00 | 3,333.33 | 1,111.11 | 370.37  | 123.46   | 41.15    | 13.72    | 4.57     | 1.52     | 0.51     | 0.17     | Blk                         |
| H                                  | 10,000.00 | 3,333.33 | 1,111.11 | 370.37  | 123.46   | 41.15    | 13.72    | 4.57     | 1.52     | 0.51     | 0.17     | Blk                         |
|                                    |           |          |          |         |          |          |          |          |          |          |          | BLN14 Std 10,000-0.17 ng/ml |
| M1-M10: 0.1 mg BLN14 treated mice  |           |          |          |         |          |          |          |          |          |          |          |                             |
| M11-M15 0.01 mg BLN14 treated mice |           |          |          |         |          |          |          |          |          |          |          |                             |

**B**

| Blanked Data [OD 405]             |           |          |          |          |          |          |          |          |          |      |          |                             |
|-----------------------------------|-----------|----------|----------|----------|----------|----------|----------|----------|----------|------|----------|-----------------------------|
|                                   | 1         | 2        | 3        | 4        | 5        | 6        | 7        | 8        | 9        | 10   | 11       | 12                          |
| A                                 | -0.004    | -0.001   | 0.009    | 0.016    | 0.021    | 0.02     | 0.019    | 0.017    | 0.01     |      |          | -0.003                      |
| B                                 | 0.005     | 0.012    | 0.021    | 0.013    | 0.017    | 0.013    | 0.009    | 0.006    | 0.005    |      |          | 0.007                       |
| C                                 | 0.005     | 0.018    | 0.02     | 0.015    | 0.015    | 0.011    | 0.004    | 0.009    | 0.01     |      |          | 0.01                        |
| D                                 | 0.012     | 0.014    | 0.021    | 0.021    | 0.018    | 0.01     | 0.013    | 0.016    | 0.02     |      |          | 0.013                       |
| E                                 | 0.004     | 0.014    | 0.019    | 0.02     | 0.015    | 0.014    | 0.016    | 0.017    | 0.014    |      |          | 0.01                        |
| F                                 | 0.008     | 0.012    | 0.013    | 0.013    | 0.011    | 0.007    | 0.003    | 0.002    | 0.003    |      |          | 0.006                       |
| G                                 | 0.83      | 0.78     | 0.76     | 0.72     | 0.59     | 0.41     | 0.23     | 0.10     | 0.04     | 0.01 | 0.00     | 0.001                       |
| H                                 | 0.82      | 0.80     | 0.79     | 0.73     | 0.68     | 0.51     | 0.32     | 0.14     | 0.05     | 0.02 | 0.00     | -0.001                      |
|                                   |           |          |          |          |          |          |          |          |          |      |          | BLN12 Std 10,000-0.17 ng/ml |
| Plate description                 |           |          |          |          |          |          |          |          |          |      |          |                             |
|                                   | 1         | 2        | 3        | 4        | 5        | 6        | 7        | 8        | 9        | 10   | 11       | 12                          |
| A                                 | M1 1:10   | M2 1:10  | M3 1:10  | M4 1:10  | M5 1:10  | M6 1:10  | M7 1:10  | M8 1:10  | M9 1:10  |      | NC 1:10  |                             |
| B                                 | M1 1:20   | M2 1:20  | M3 1:20  | M4 1:20  | M5 1:20  | M6 1:20  | M7 1:20  | M8 1:20  | M9 1:20  |      | NC 1:20  |                             |
| C                                 | M1 1:40   | M2 1:40  | M3 1:40  | M4 1:40  | M5 1:40  | M6 1:40  | M7 1:40  | M8 1:40  | M9 1:40  |      | NC 1:40  |                             |
| D                                 | M1 1:80   | M2 1:80  | M3 1:80  | M4 1:80  | M5 1:80  | M6 1:80  | M7 1:80  | M8 1:80  | M9 1:80  |      | NC 1:80  |                             |
| E                                 | M1 1:160  | M2 1:160 | M3 1:160 | M4 1:160 | M5 1:160 | M6 1:160 | M7 1:160 | M8 1:160 | M9 1:160 |      | NC 1:160 |                             |
| F                                 | M1 1:320  | M2 1:320 | M3 1:320 | M4 1:320 | M5 1:320 | M6 1:320 | M7 1:320 | M8 1:320 | M9 1:320 |      | NC 1:320 |                             |
| G                                 | 10,000.00 | 3,333.33 | 1,111.11 | 370.37   | 123.46   | 41.15    | 13.72    | 4.57     | 1.52     | 0.51 | 0.17     | Blk                         |
| H                                 | 10,000.00 | 3,333.33 | 1,111.11 | 370.37   | 123.46   | 41.15    | 13.72    | 4.57     | 1.52     | 0.51 | 0.17     | Blk                         |
|                                   |           |          |          |          |          |          |          |          |          |      |          | BLN12 Std 10,000-0.17 ng/ml |
| M1-M4: 0.1 mg BLN12 treated mice  |           |          |          |          |          |          |          |          |          |      |          |                             |
| M5-M9: 0.01 mg BLN12 treated mice |           |          |          |          |          |          |          |          |          |      |          |                             |

**C**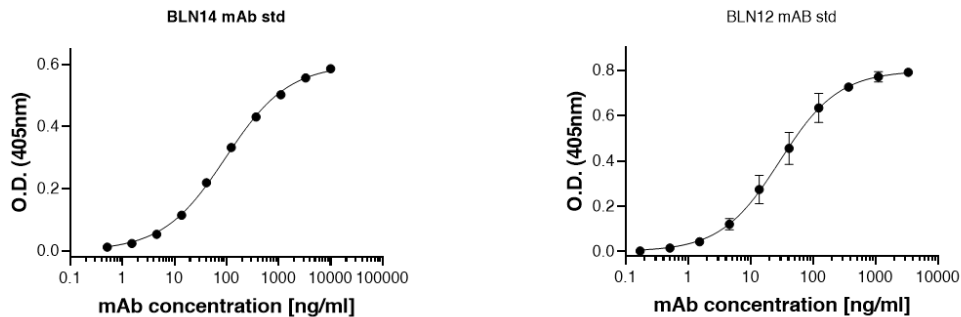**Figure S7: Quantification of human antibodies in mice sera, at 21 dpi. Relates to Figure 4.**

Mice were treated with BLN12 and BLN14 mAbs at 2 dpi and their residual amount in the serum was evaluated at 21 dpi, by ELISA, using anti-human specific secondary antibody. **A-B.** No residual human antibodies could be detected in the mice serum, tested at the indicated dilutions. **C.** A standard curve, was constructed for each mAb, in the range of 10,000-0.17 ng/ml, showing a detection limit of 1.5 ng/ml and 4.6 ng/ml for BLN12 and BLN14, respectively. These concentrations are also below the limit of detection of the neutralization assay used to evaluate these sera samples.
